# Supplementary material for: Biodegradable Polyurethanes Based on Castor Oil and Poly (3-hydroxybutyrate)
Source: MDPI journal article supplement (doi:10.3390/polym13091387), 2021-04-24
Supplement: s1 [file s1]

Article

# Biodegradable Polyurethanes Based on Castor Oil and Poly (3-hydroxybutyrate)

Pathikrit Saha, Chanin Khomlaem, Hajer Aloui and Beom Soo Kim \*

Department of Chemical Engineering, Chungbuk National University, Cheongju, Chungbuk 28644, Korea; pathikritsaha89@gmail.com (P.S.); nament99@gmail.com (C.K.); hajer.aloui@gmail.com (H.A.)

\* Correspondence: bskim@chungbuk.ac.kr; Tel.: +82 43 261 2372

**Table S1.** CO/PHBD PU 8h formulations at different CO/PHBD ratio.

| CO/PHBD (g/g)* | Mass of CO (g) | OH molar equivalent in CO | Mass of PHBD (g) | OH molar equivalent in PHBD** |
|----------------|----------------|---------------------------|------------------|-------------------------------|
| 1/0            | 1              | 0.0032                    | -                | -                             |
| 9/1            | 0.9            | 0.0029                    | 0.1              | 0.0001                        |
| 8/2            | 0.8            | 0.0026                    | 0.2              | 0.0002                        |
| 7/3            | 0.7            | 0.0023                    | 0.3              | 0.0003                        |
| 6/4            | 0.6            | 0.0019                    | 0.4              | 0.0004                        |

\* Total mass: 1 g.

\*\* OH functionality in PHBD 8h: 1.92.

**Citation:** Saha, P.; Khomlaem, C.; Aloui, H.; Kim, B.S. Biodegradable Polyurethanes Based on Castor Oil and Poly (3-hydroxybutyrate). *Polymers* **2021**, *13*, 1387. <https://doi.org/10.3390/polym13091387>

Academic Editor: Arantxa Eceiza Mendiguren

Received: 31 March 2021

Accepted: 21 April 2021

Published: 24 April 2021

**Publisher's Note:** MDPI stays neutral with regard to jurisdictional claims in published maps and institutional affiliations.

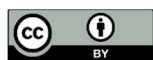

**Copyright:** © 2021 by the authors. Licensee MDPI, Basel, Switzerland. This article is an open access article distributed under the terms and conditions of the Creative Commons Attribution (CC BY) license (<http://creativecommons.org/licenses/by/4.0/>).

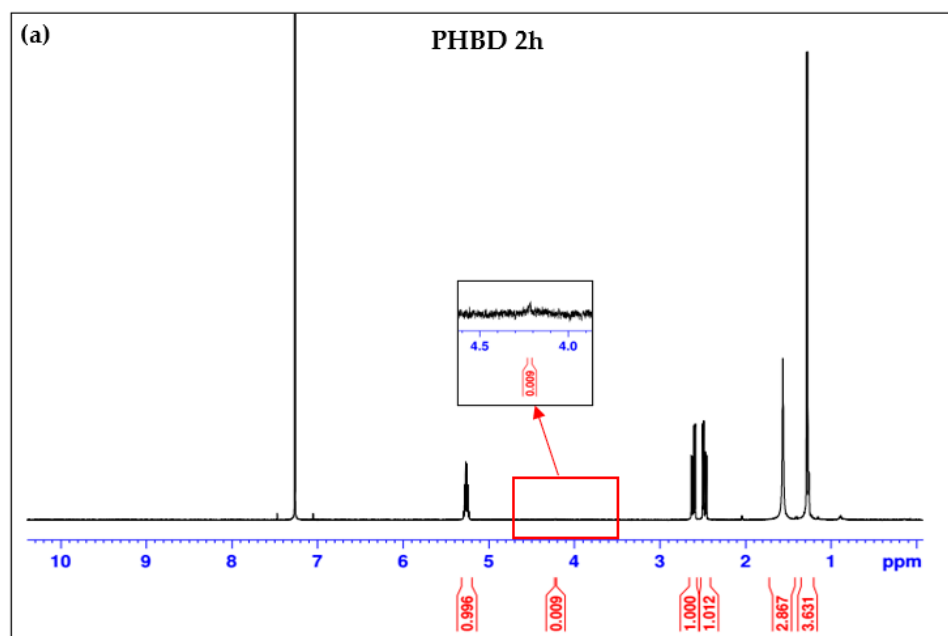

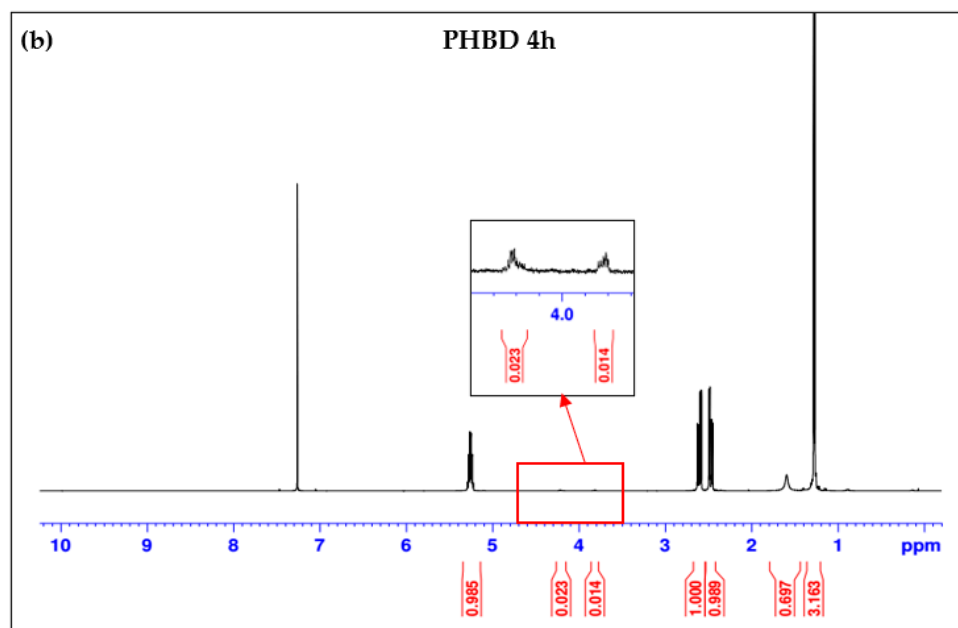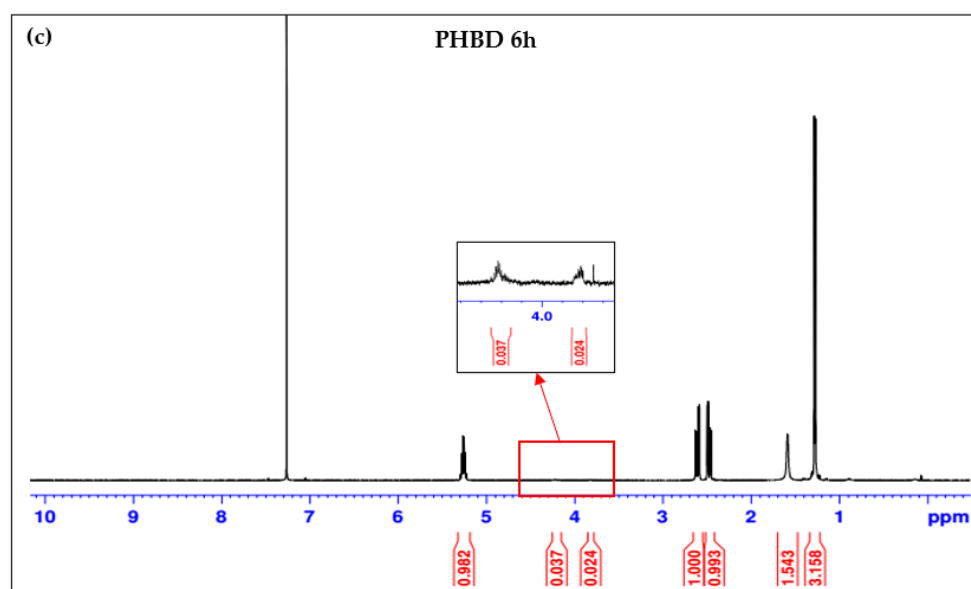

**Figure S1.**  $^1\text{H}$ NMR spectra of PHB diols obtained from different timed reactions.

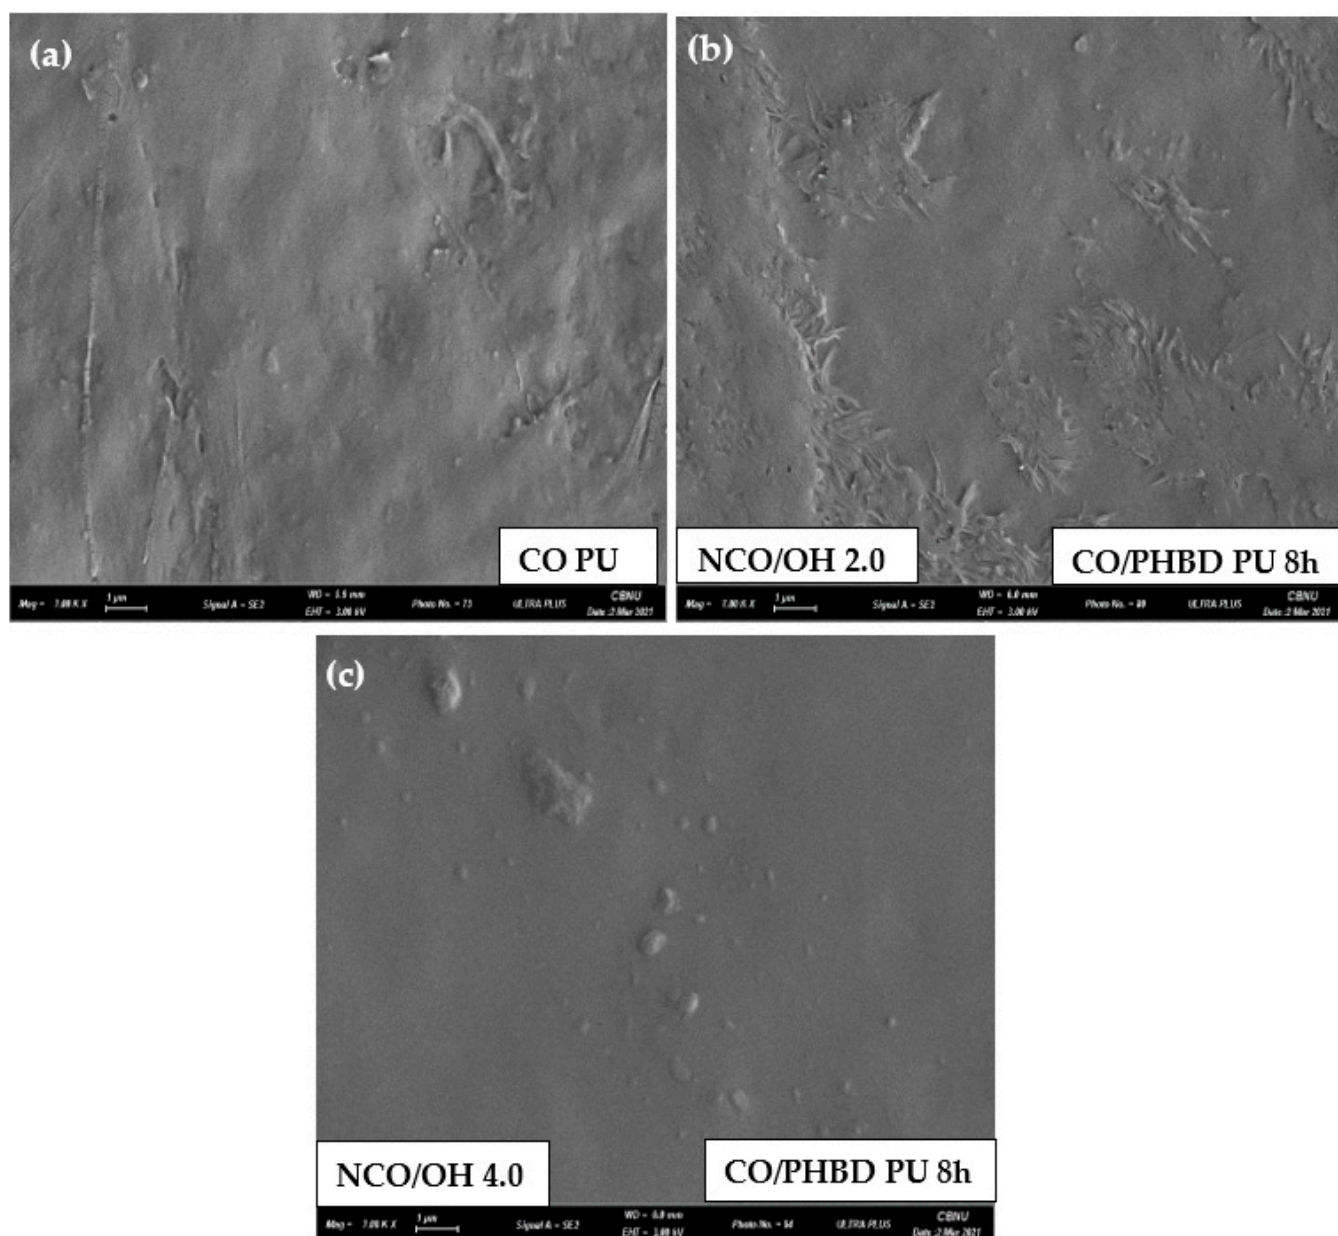

Figure S2. SEM images of CO PU (a) and CO/PHBD PU 8h with NCO/OH 2.0 (b) and 4.0 (c).

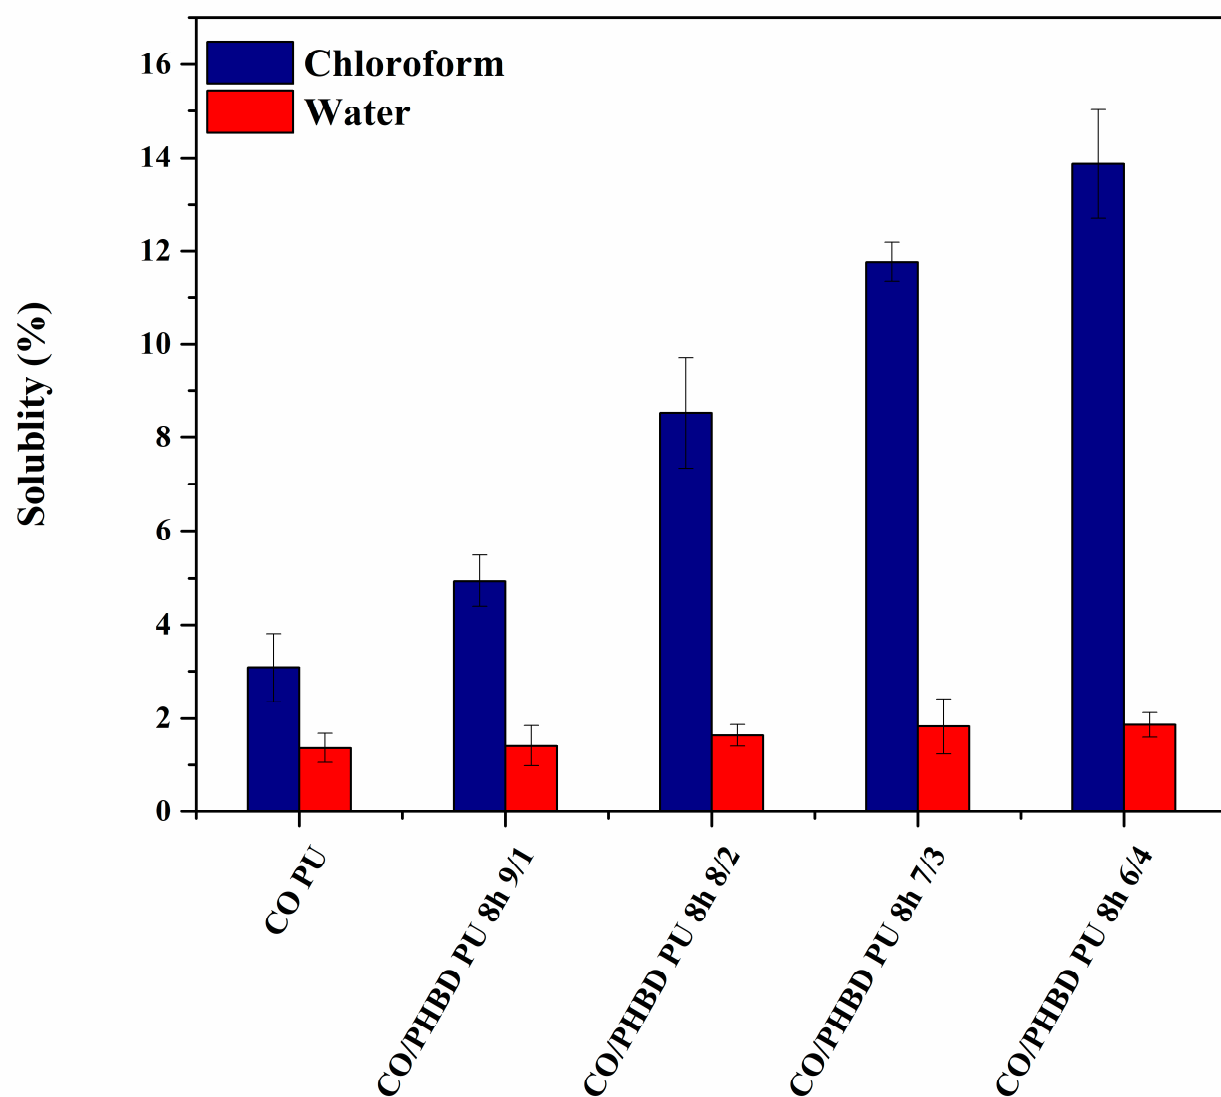

Figure S3. Solubility test of CO/PHBD PUs in water and chloroform.

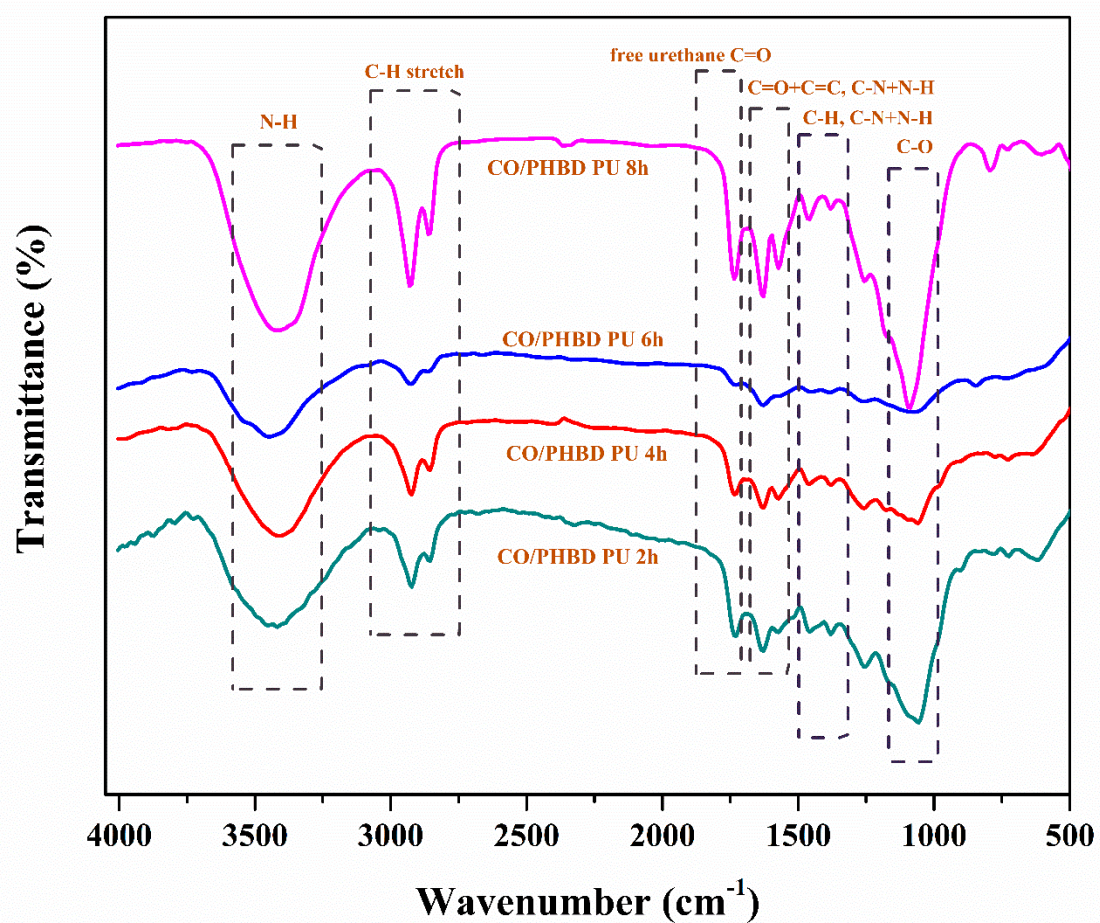

Figure S4. FTIR spectra of different CO/PHBD PUs.

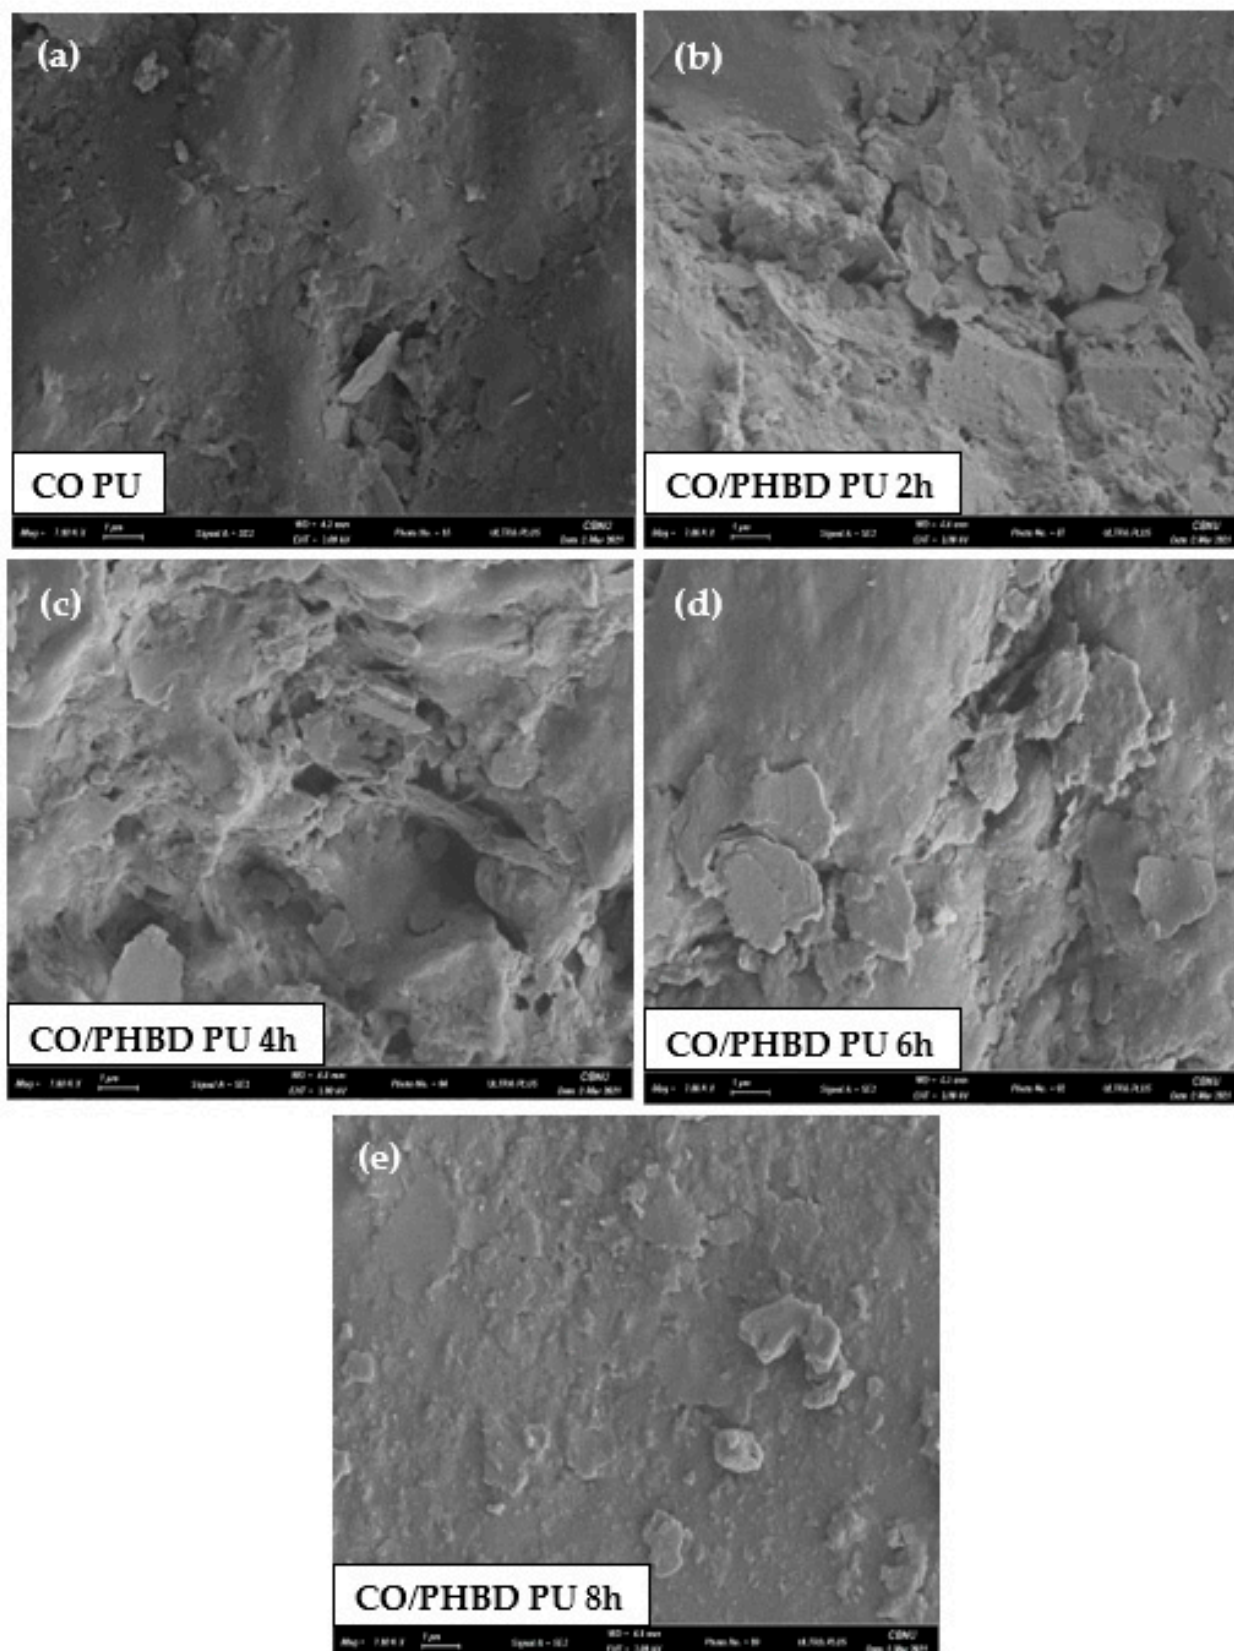

Figure S5. SEM analysis of CO/PHBD PUs after 35 days soil burial test.
